# Supplementary material
Source: Research Square preprint supplement (doi:10.21203/rs.3.rs-9682117/v1)
Supplement: Supplementary file 1 [file 2c65fb7979e830bc1a6c7600.docx]

**Supplemental Tables:**

**Table S1. Mean topography and stand characteristics of Masson pine forest in the study area.**

| **Stand Condition** | **Shady slopes** | **Sunny sloeps** |
| --- | --- | --- |
| Elevation (m) | 152.82 | 184.96 |
| Aspect (◦) | 18.00 | 21.83 |
| Tree height (m) | 8.34 | 7.27 |
| Diameter at breast height (cm) | 11.96 | 11.01 |
| Bole height to the first branch (m) | 3.06 | 2.75 |
| Canopy density (%) | 40.00 | 24.17 |

**Table S2. Gradients of weather factors used for comparing SFFMC.**

| **Weather factors** | **Gradients** | **Values** |
| --- | --- | --- |
| Temperature (℃) | Low | <15 |
| Moderate | 15≤x＜20 |
| High | >30 |
| RH (%) | Low | 30≤x＜55 |
| Moderate | 55≤x＜75 |
| High | >75 |
| Wind speed (m/s) | Low | 0.3≤x＜1 |
| Moderate | 1≤x＜1.5 |
| High | >1.5 |
| Illumination (lux) | Lower | 0≤x＜1500 |
| Low | 1500≤x＜3000 |
| Moderate | 3000≤x＜5000 |
| High | >5000 |
| Vapor Pressure Deficit | Low | 0≤x＜0.02 |
| Moderate | 0.02 ≤ x ＜ 0.035 |
| High | >0.035 |
| No precipitation | 0 |
| Precipitation | Low | 0≤ x ＜5 |
| Moderate | 5≤ x ＜15 |
| High | 15≤ x ＜30 |
| Extreme precipitation | ＞30 |

**Table. S3 XGBoost vs. Random Forest: Key Hyperparameter Comparison.**

| **Hyperparameter Comparison** | | |
| --- | --- | --- |
| **Parameter** | **XGBoost** | **Random Forest** |
| Model Type | Gradient Boosting | Random Forest |
| Number of Trees | 1000 | 1000 |
| Learning Rate | 0.1 | - |
| Max Depth | 8 | Unlimited |
| Row Sampling Ratio | 0.9 | 1.0 (bootstrap) |
| Column Sampling | 0.9 (colsample_bytree) | 3 (mtry) |
| Min Loss Reduction | 0.1 (gamma) | - |
| Min Child Weight | 1 | - |
| L2 Regularization | 0.5 (lambda) | - |
| L1 Regularization | 0 (alpha) | - |
| Min Samples per Node | - | 5 (nodesize) |
| Early Stopping Rounds | 20 | - |
| Feature Importance | SHAP values | Gini importance |

**Supplemental Figures:**


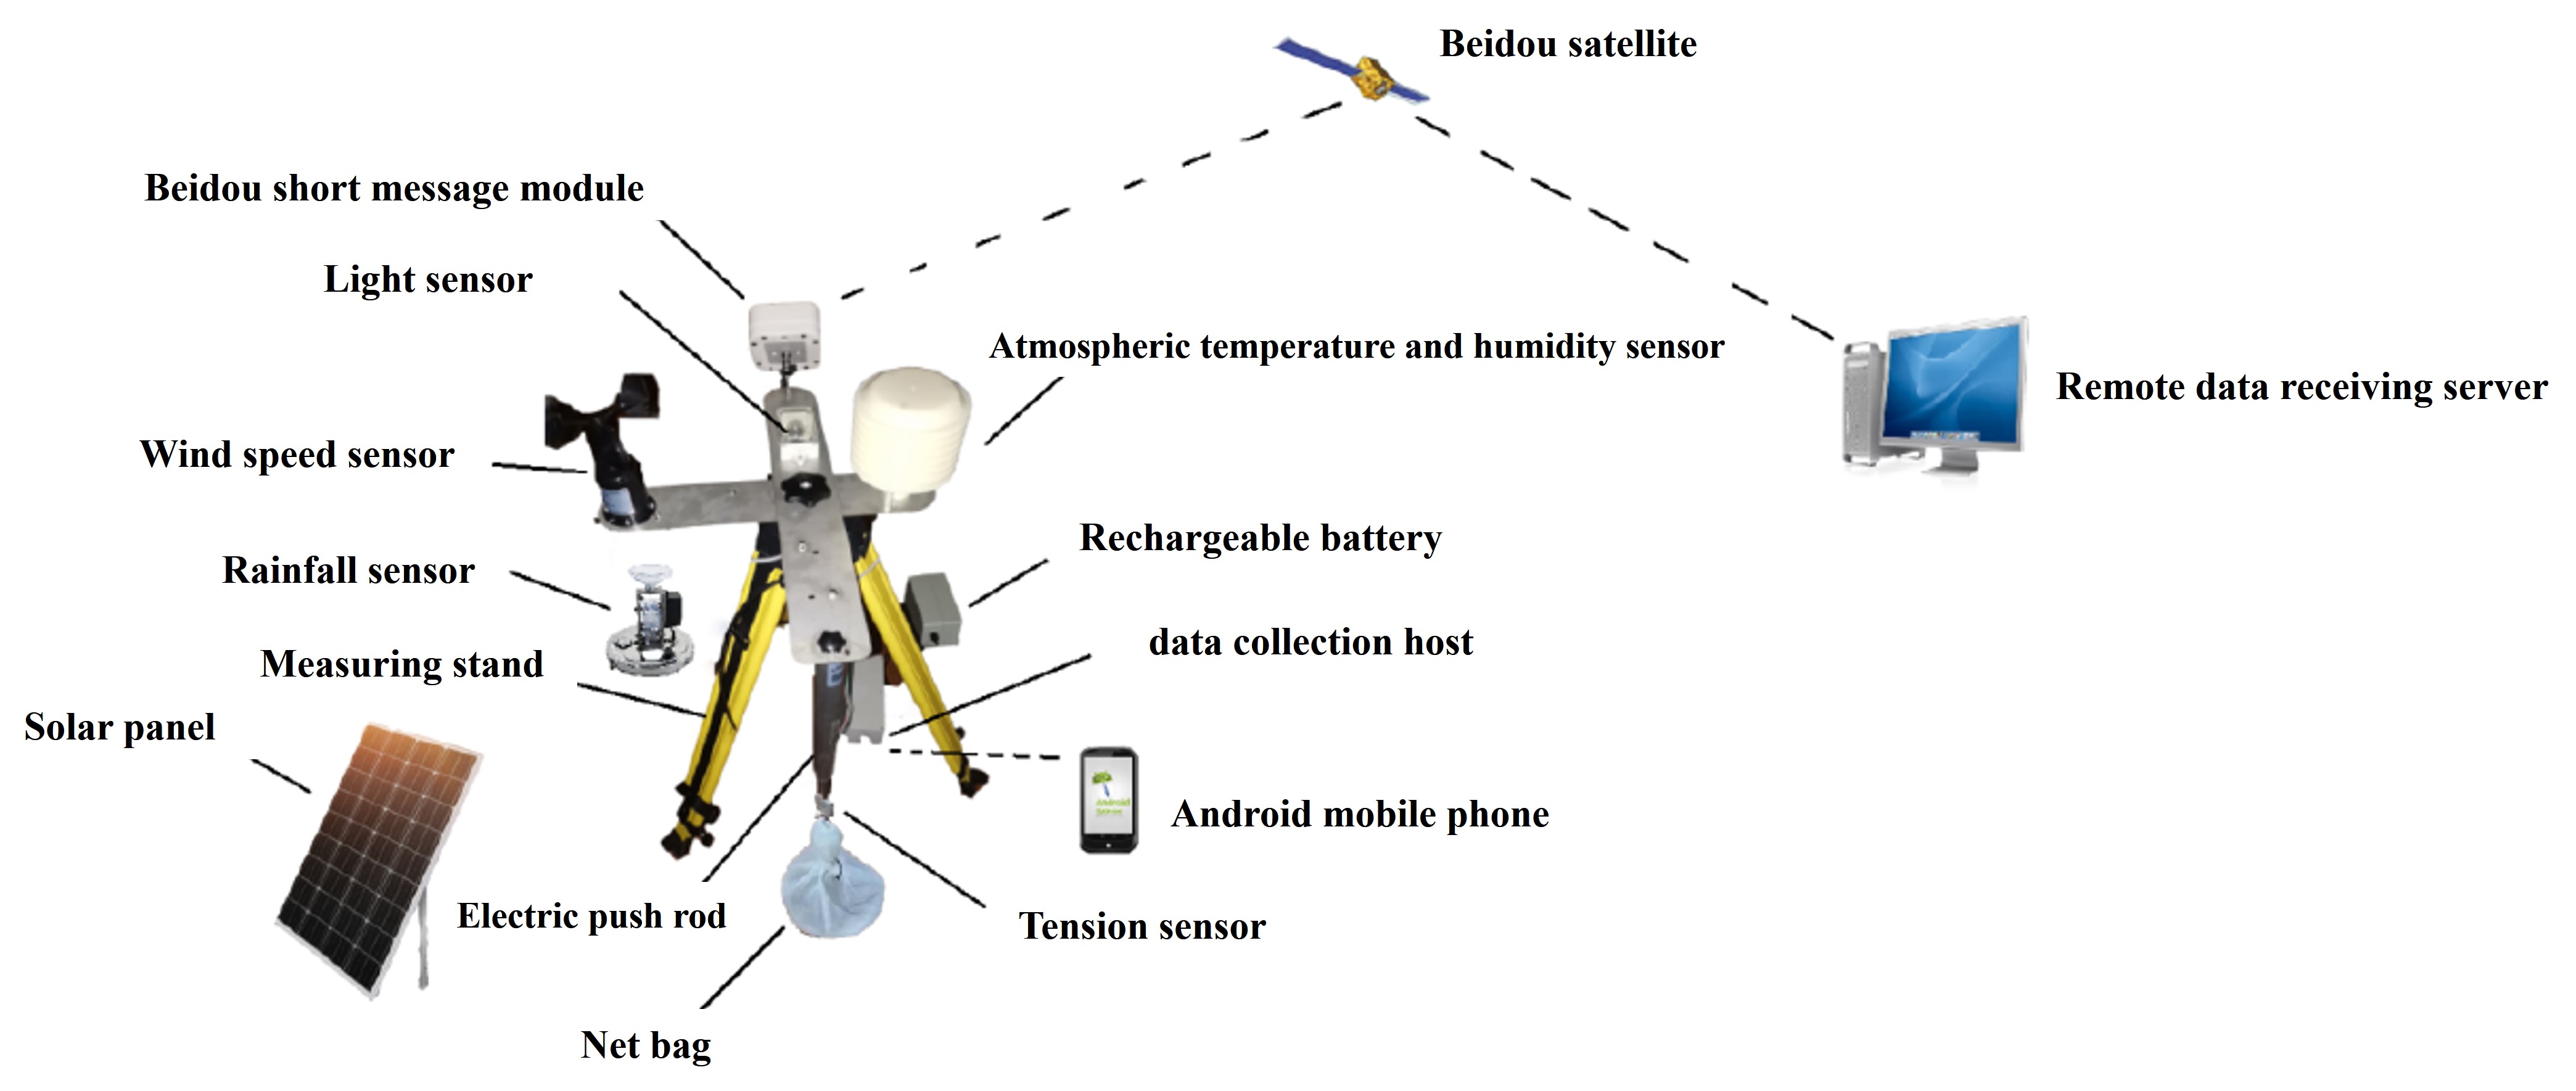


**Fig. S1 Fuel moisture content monitoring equipment System structure diagram.**


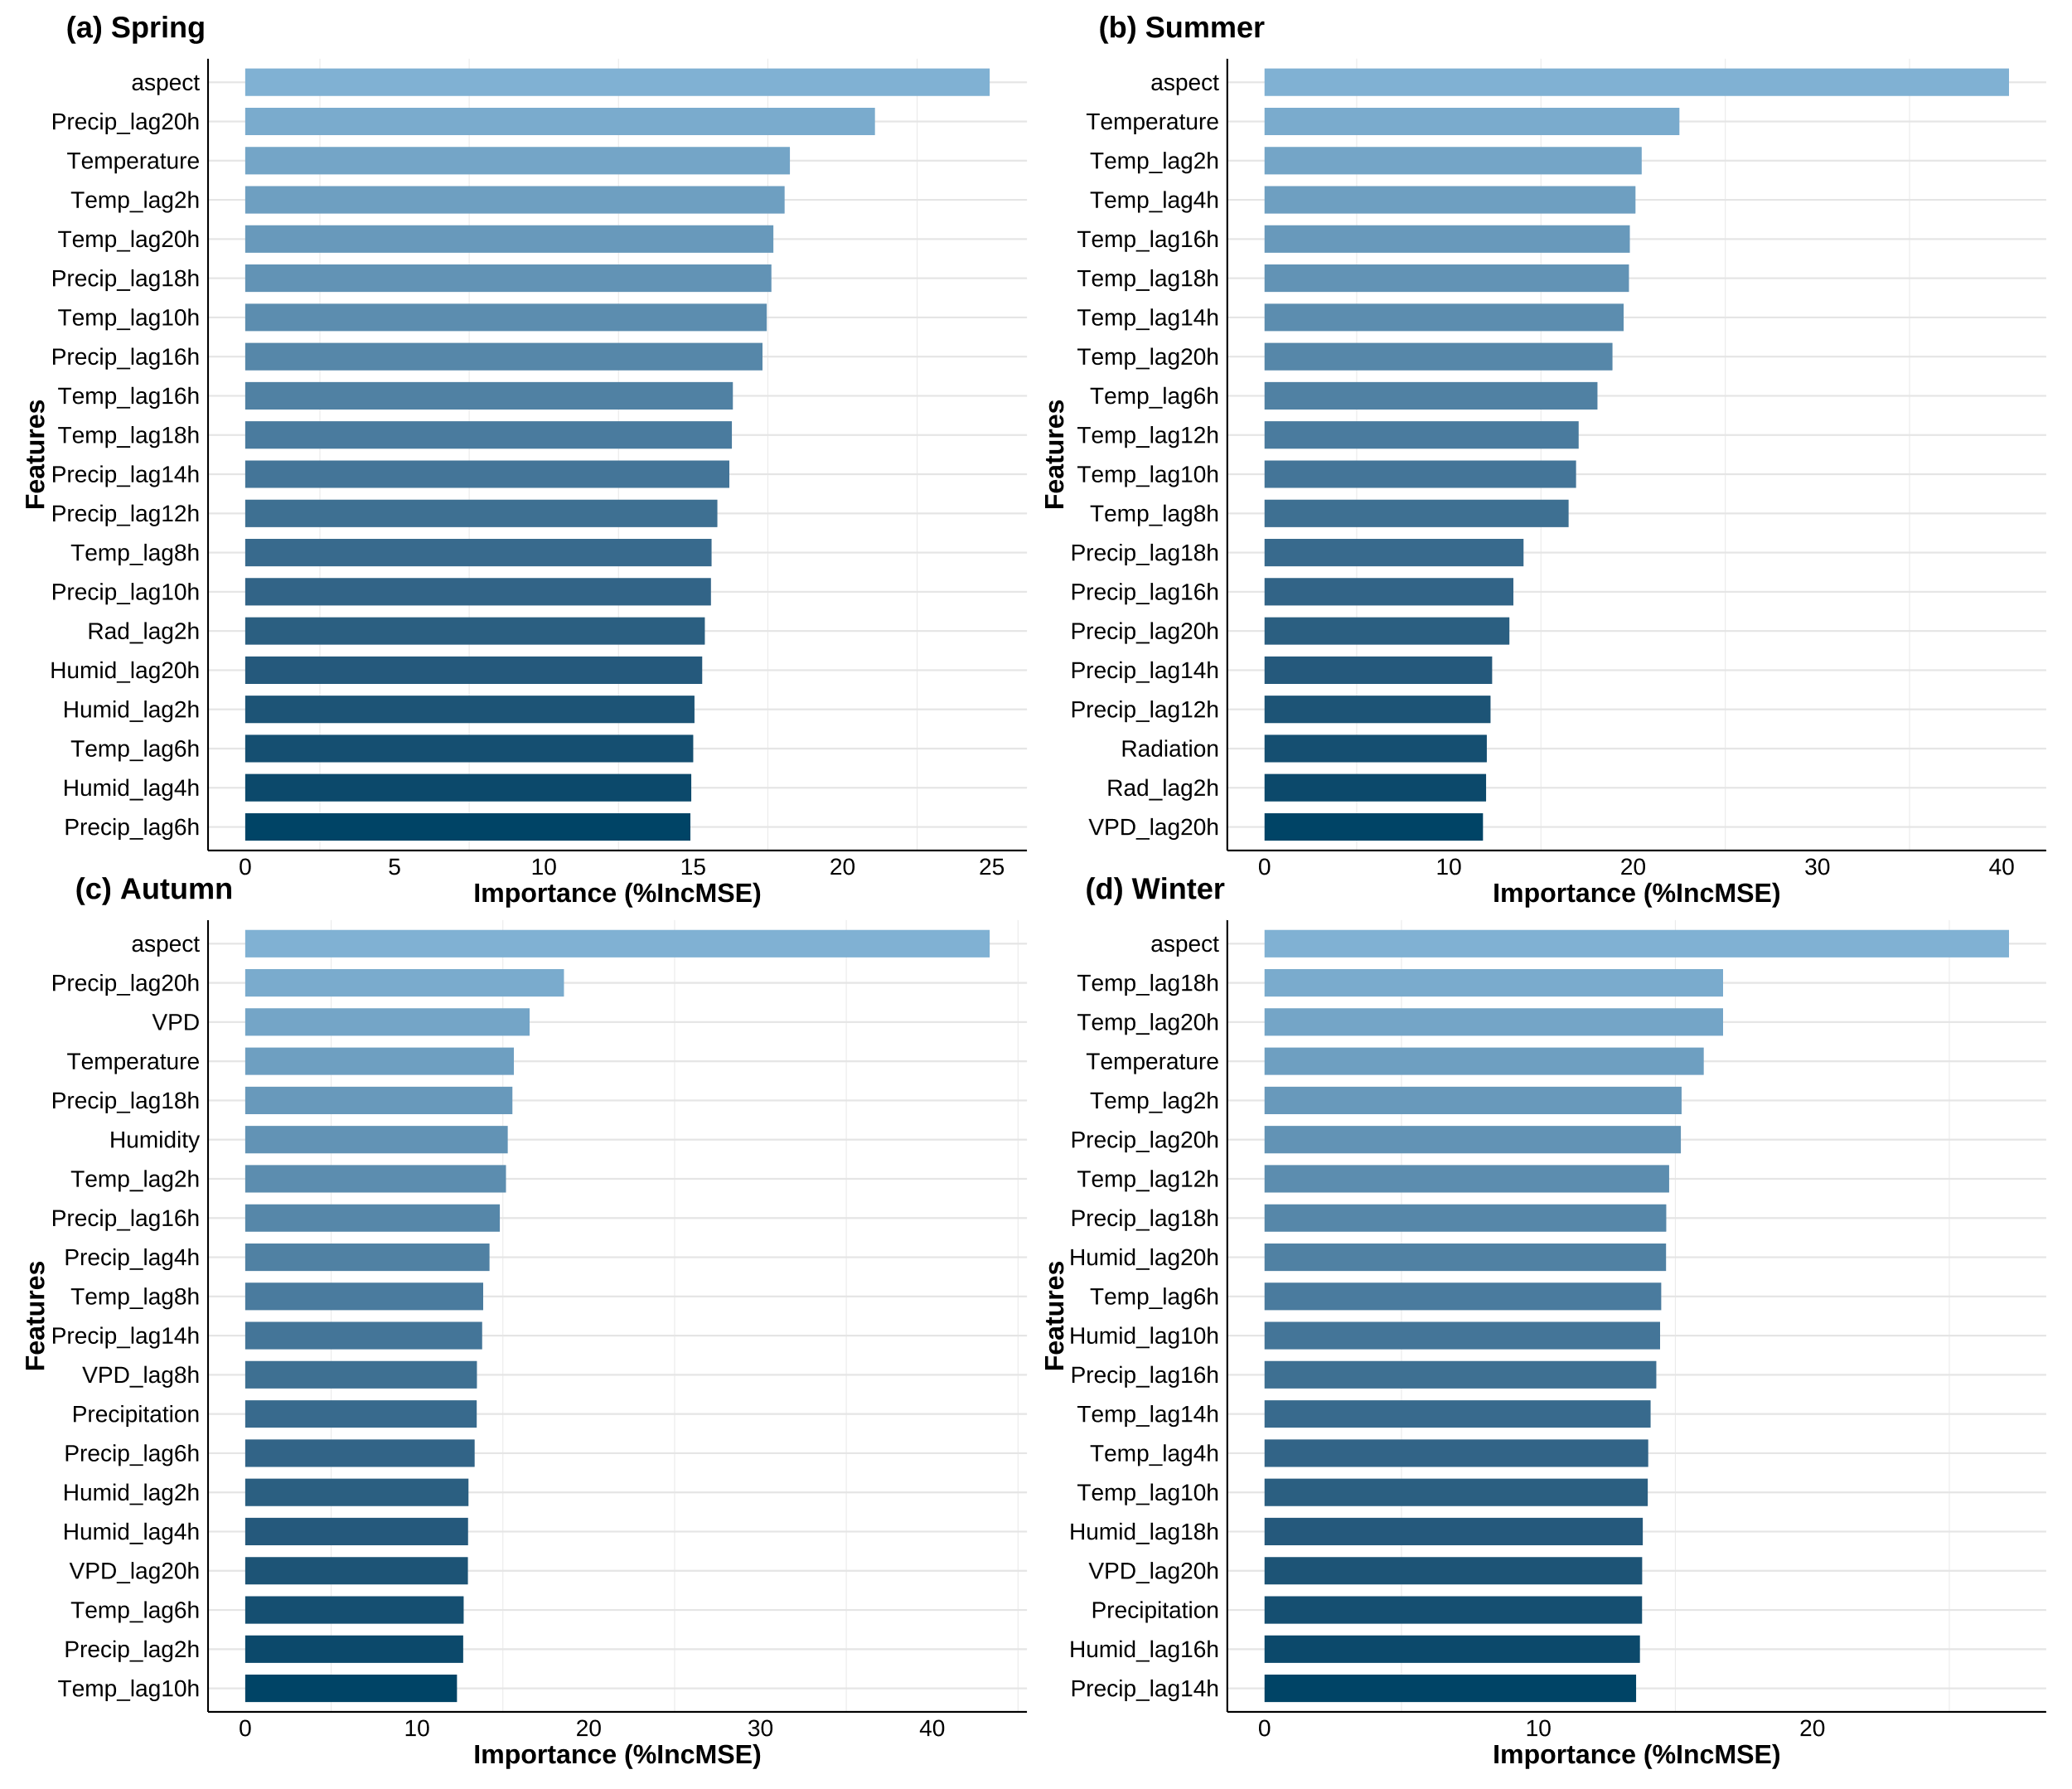


**Fig S2 Seasonal Random Forest-based feature screening of candidate predictors for SFFMC modeling.**


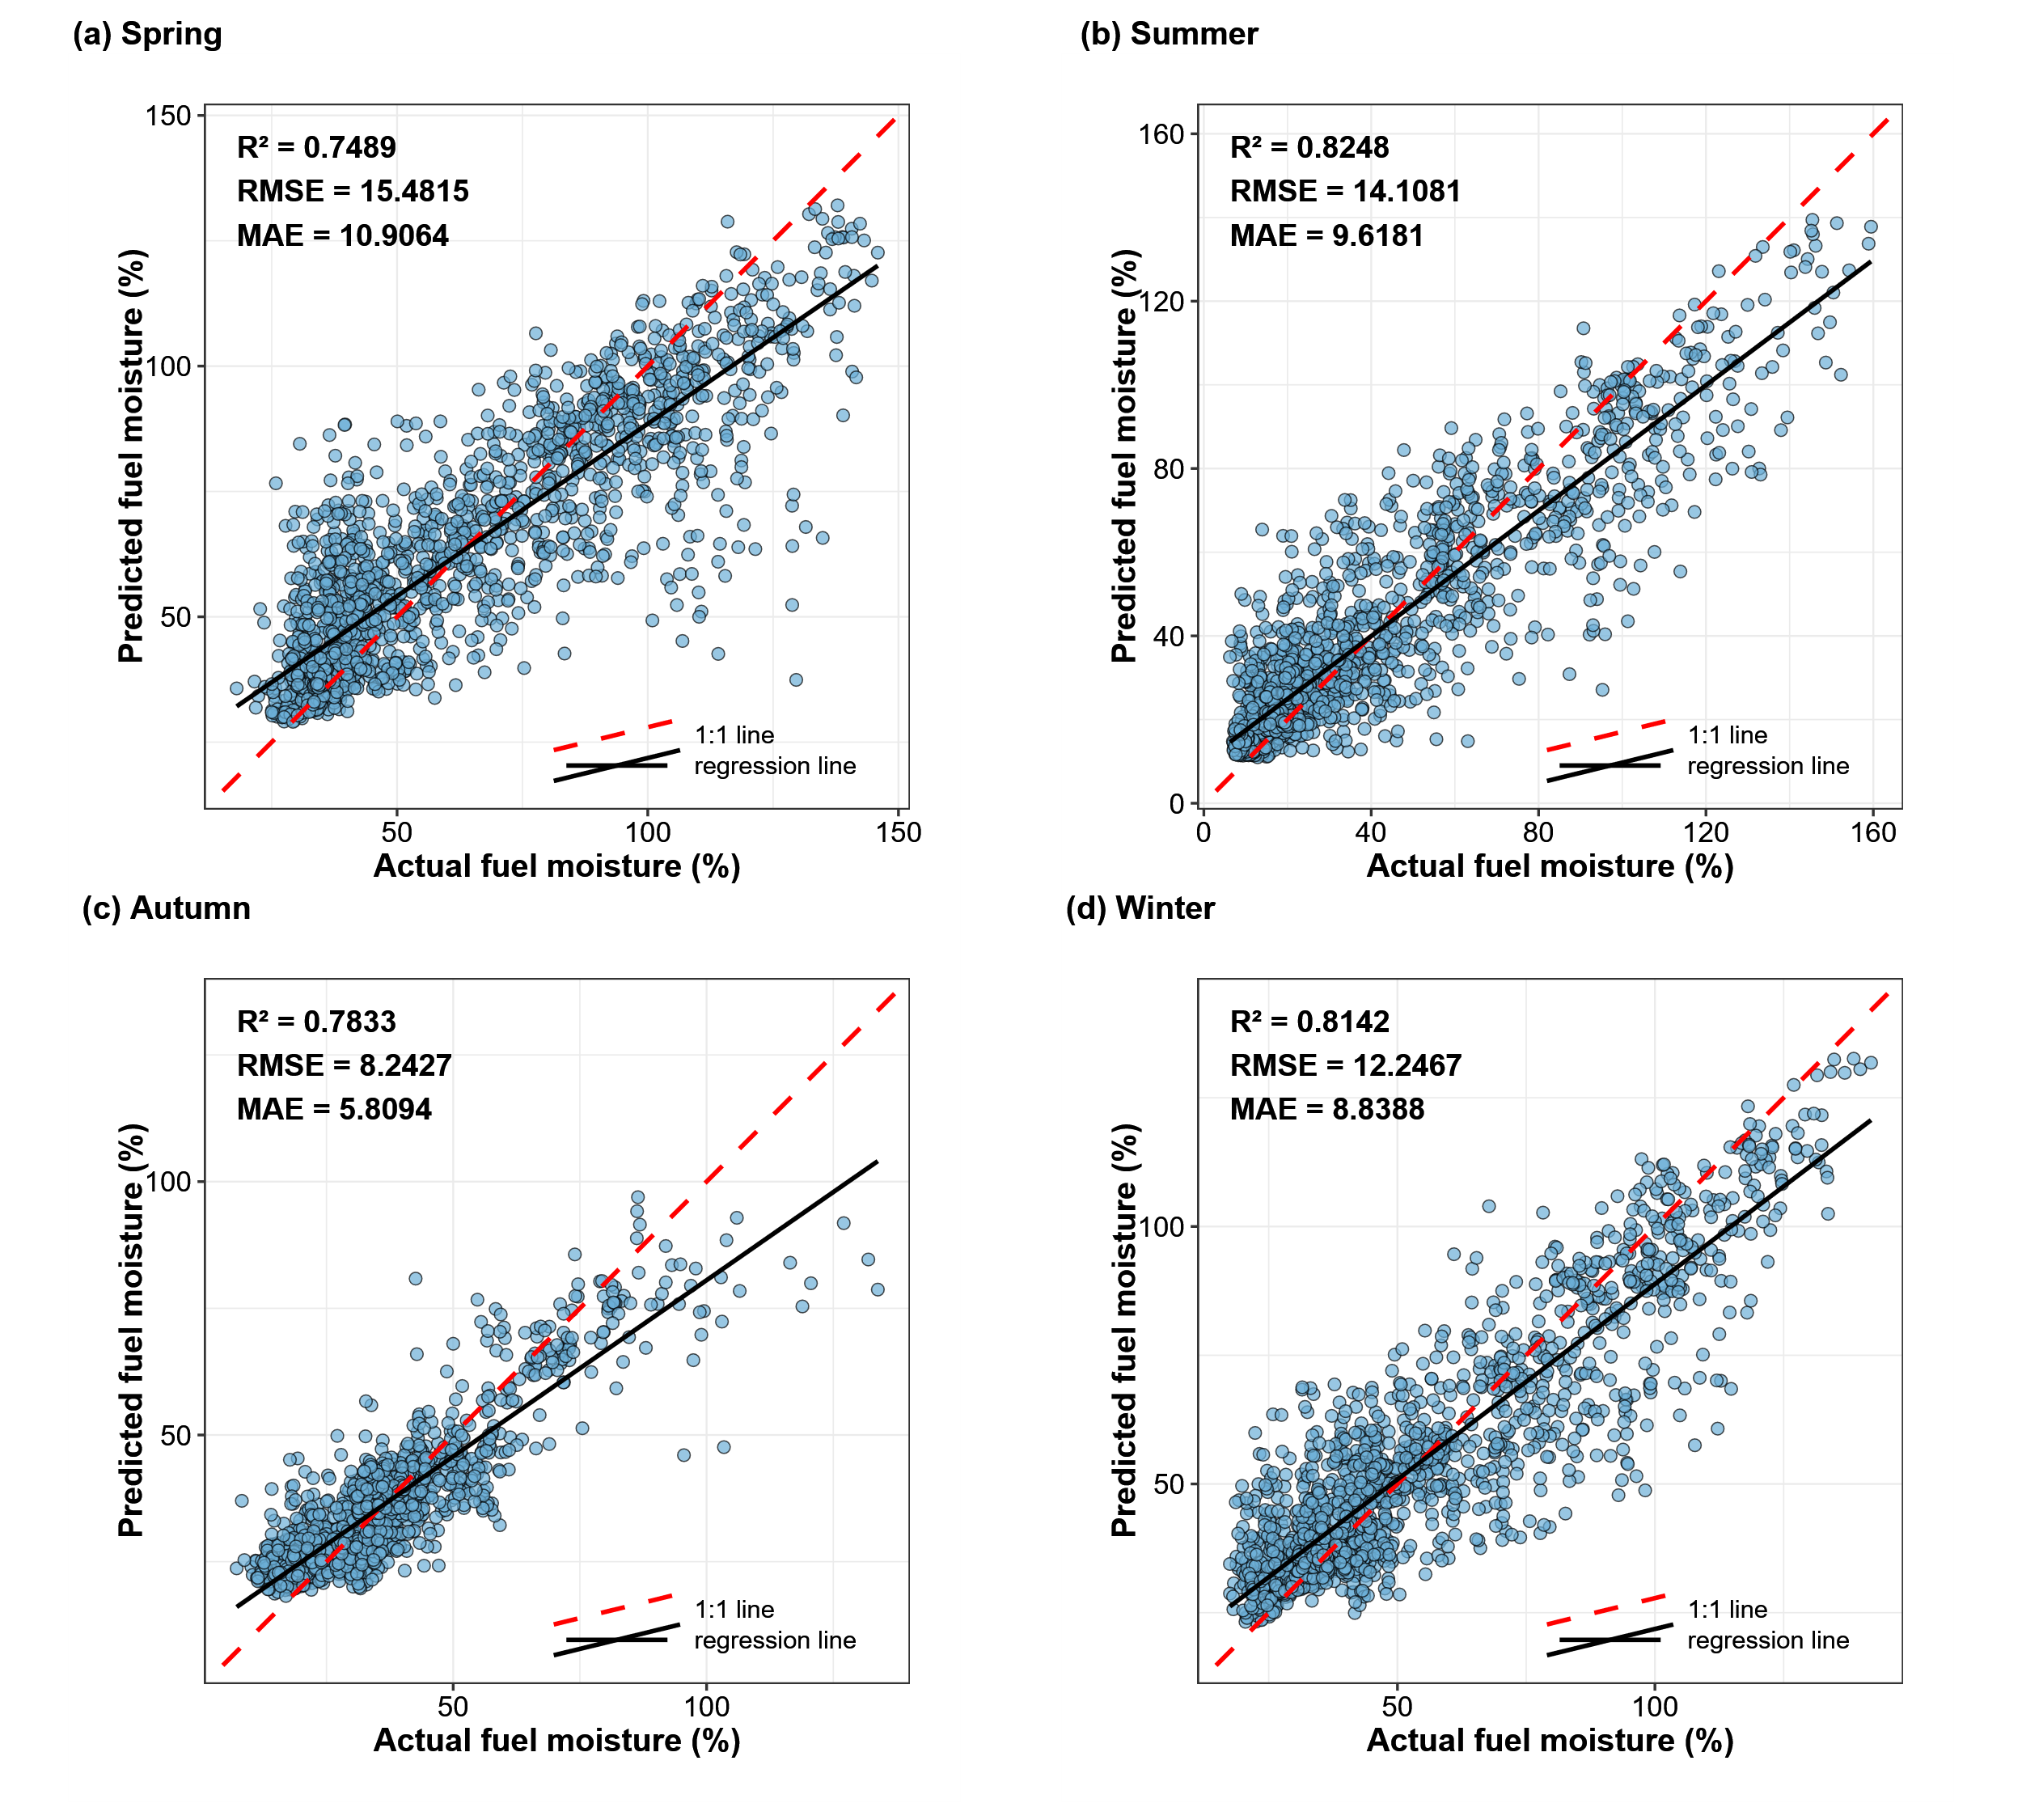


**Fig. S3 Random Forest Model 1:1 Verification Graph.**


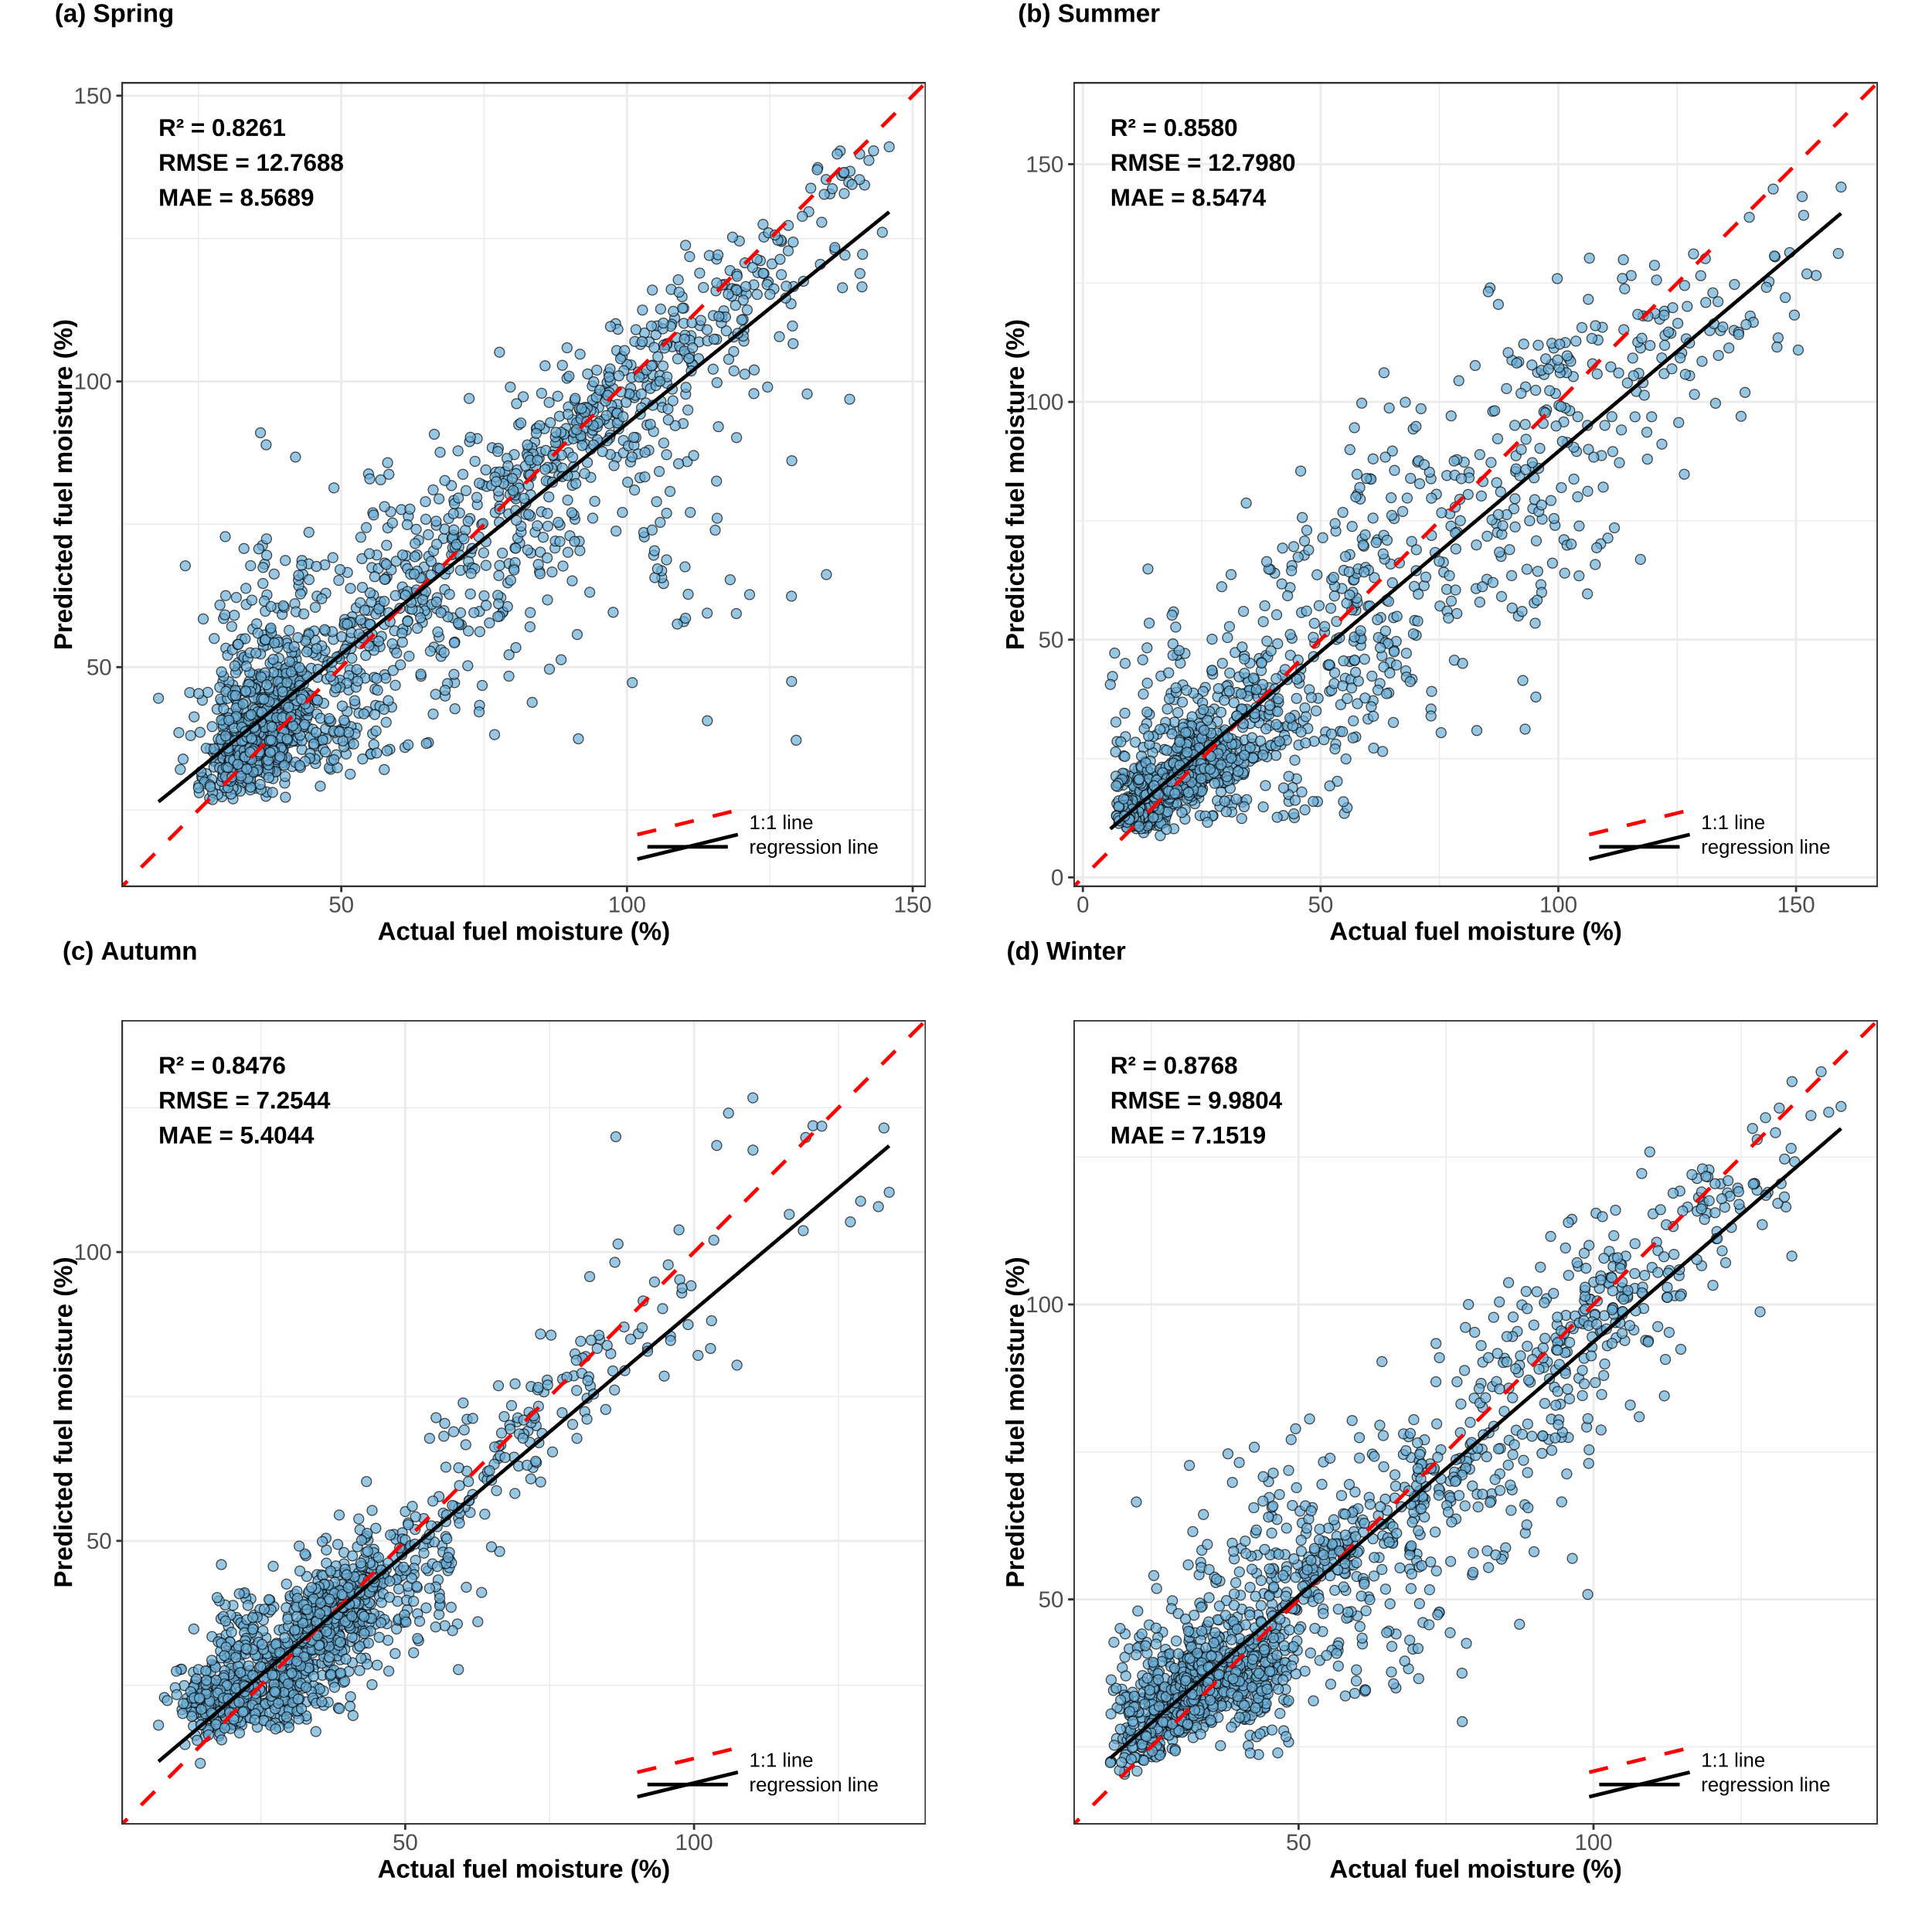
 **Fig. S4 XGBoost Model 1:1 Verification Graph.**


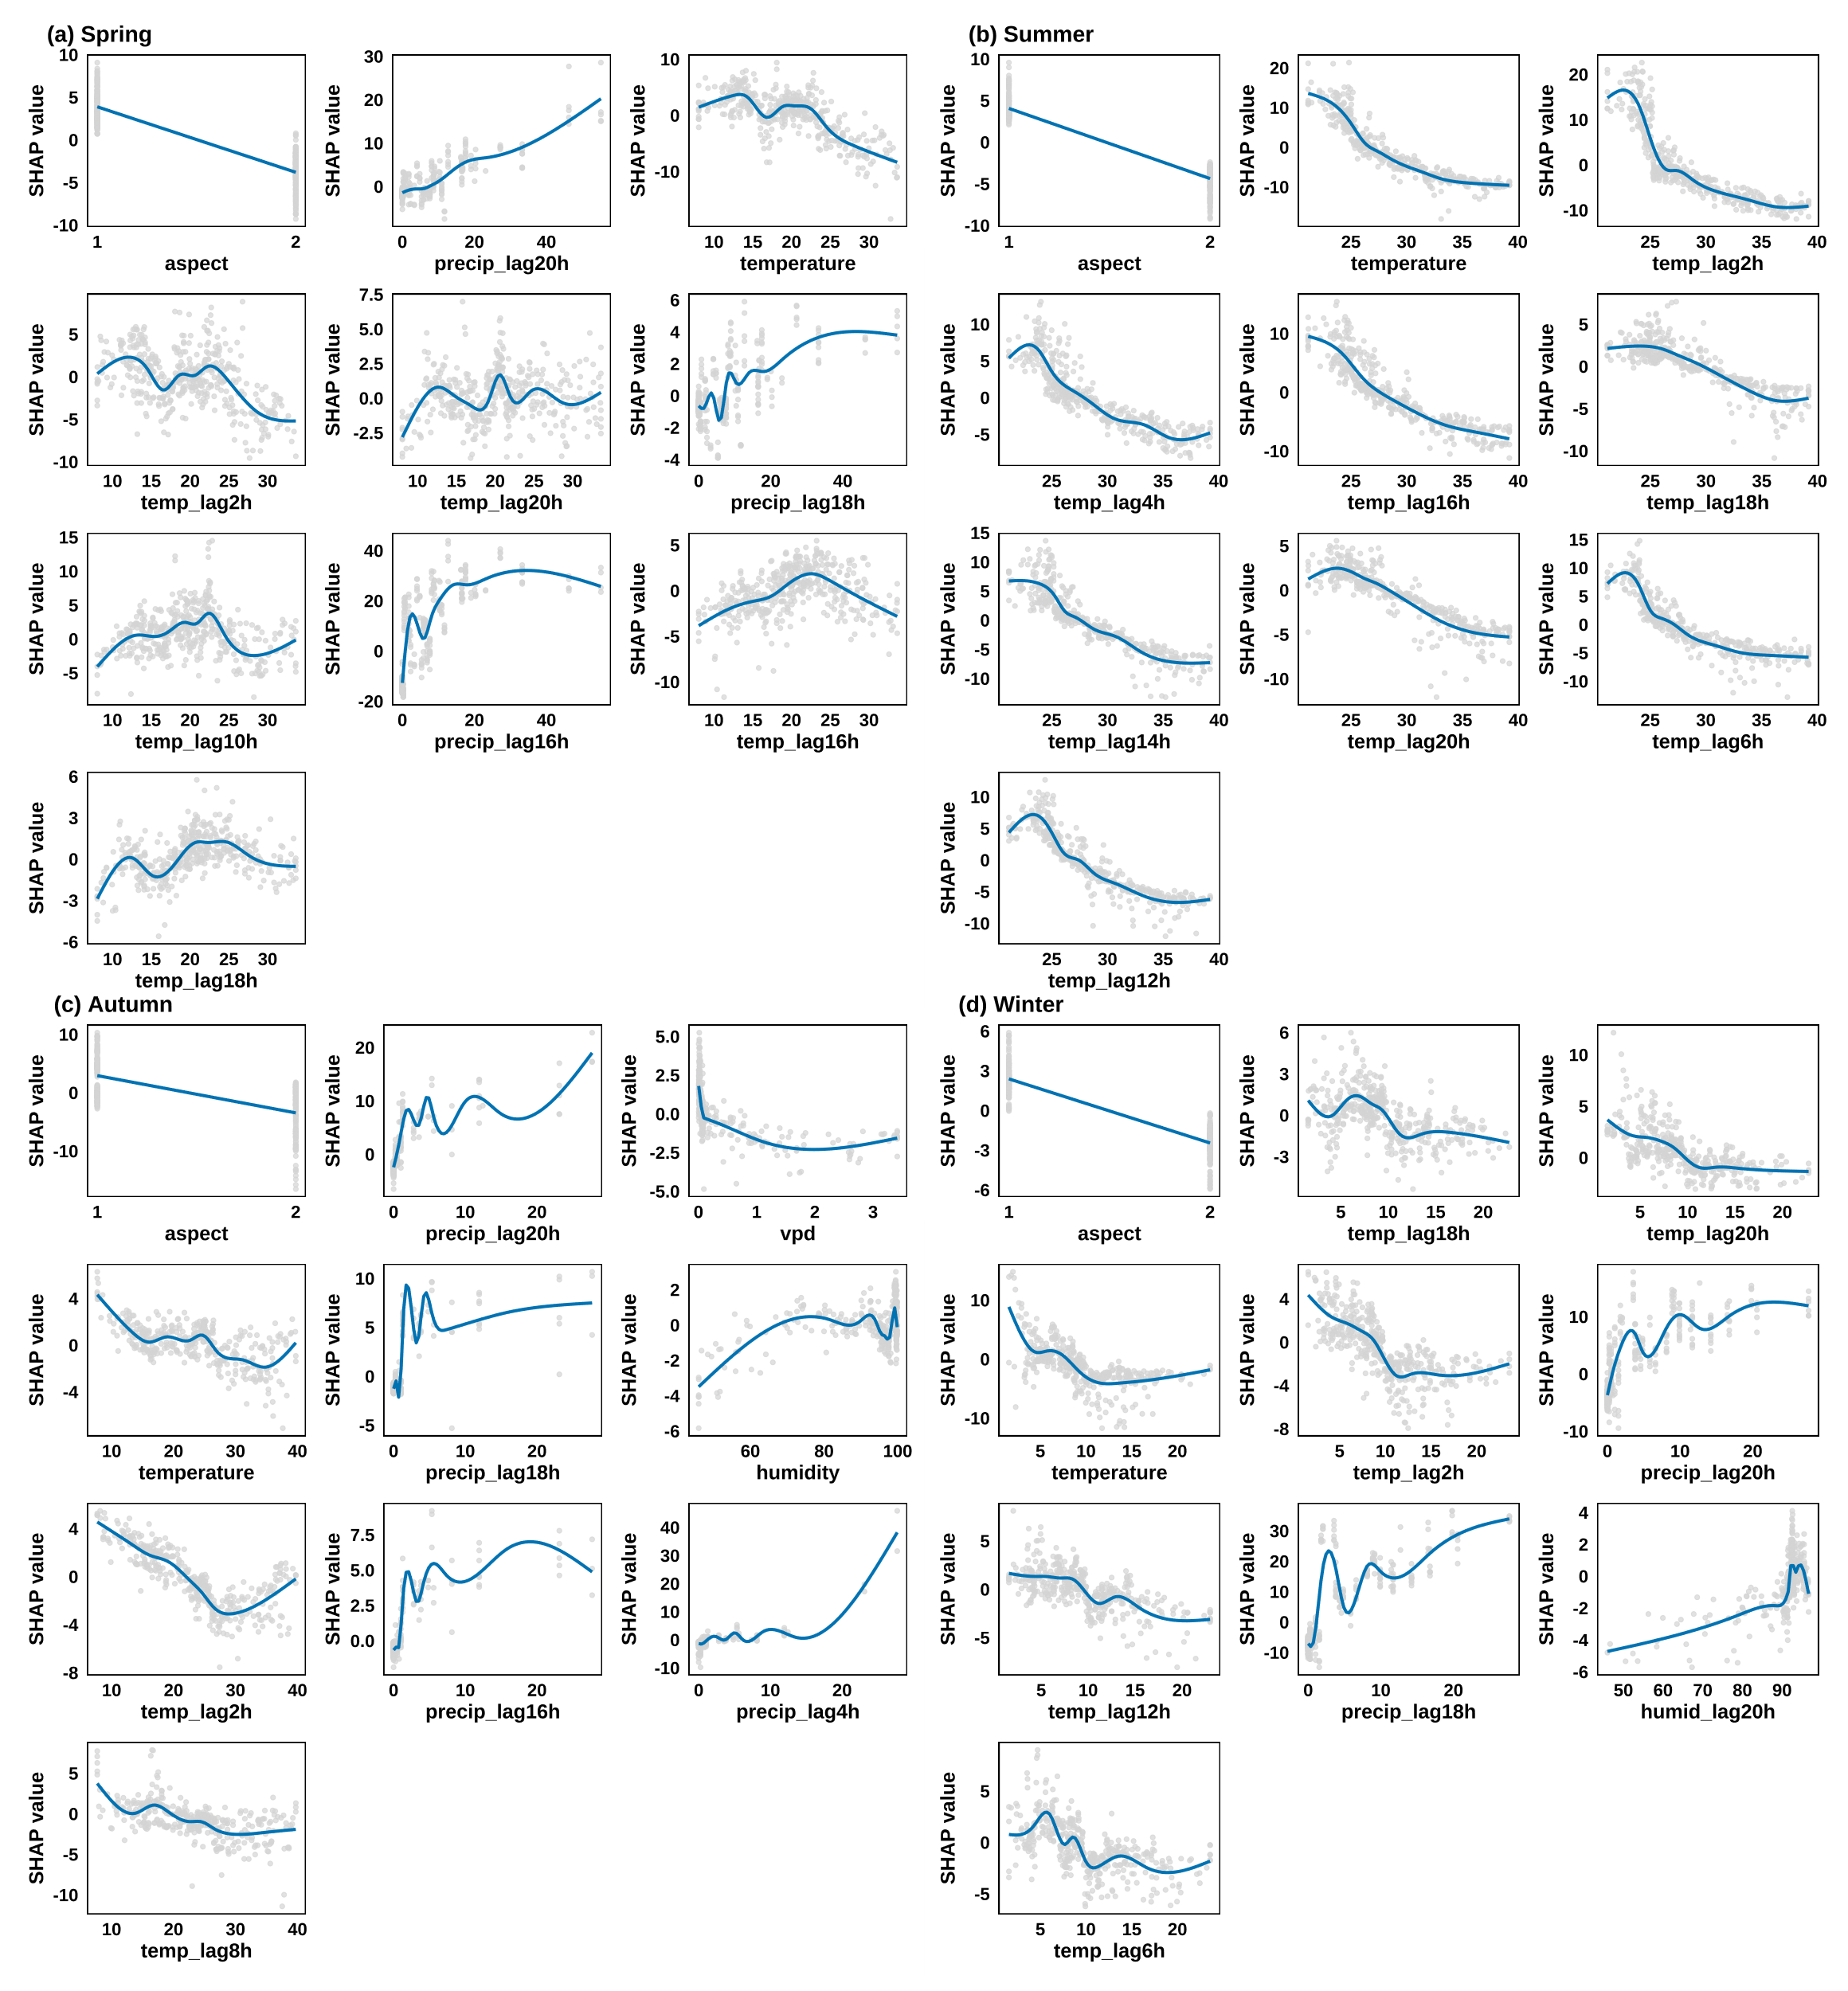


**Fig. S5 XGBoost Model Partial Correlation Dependence Graph.**


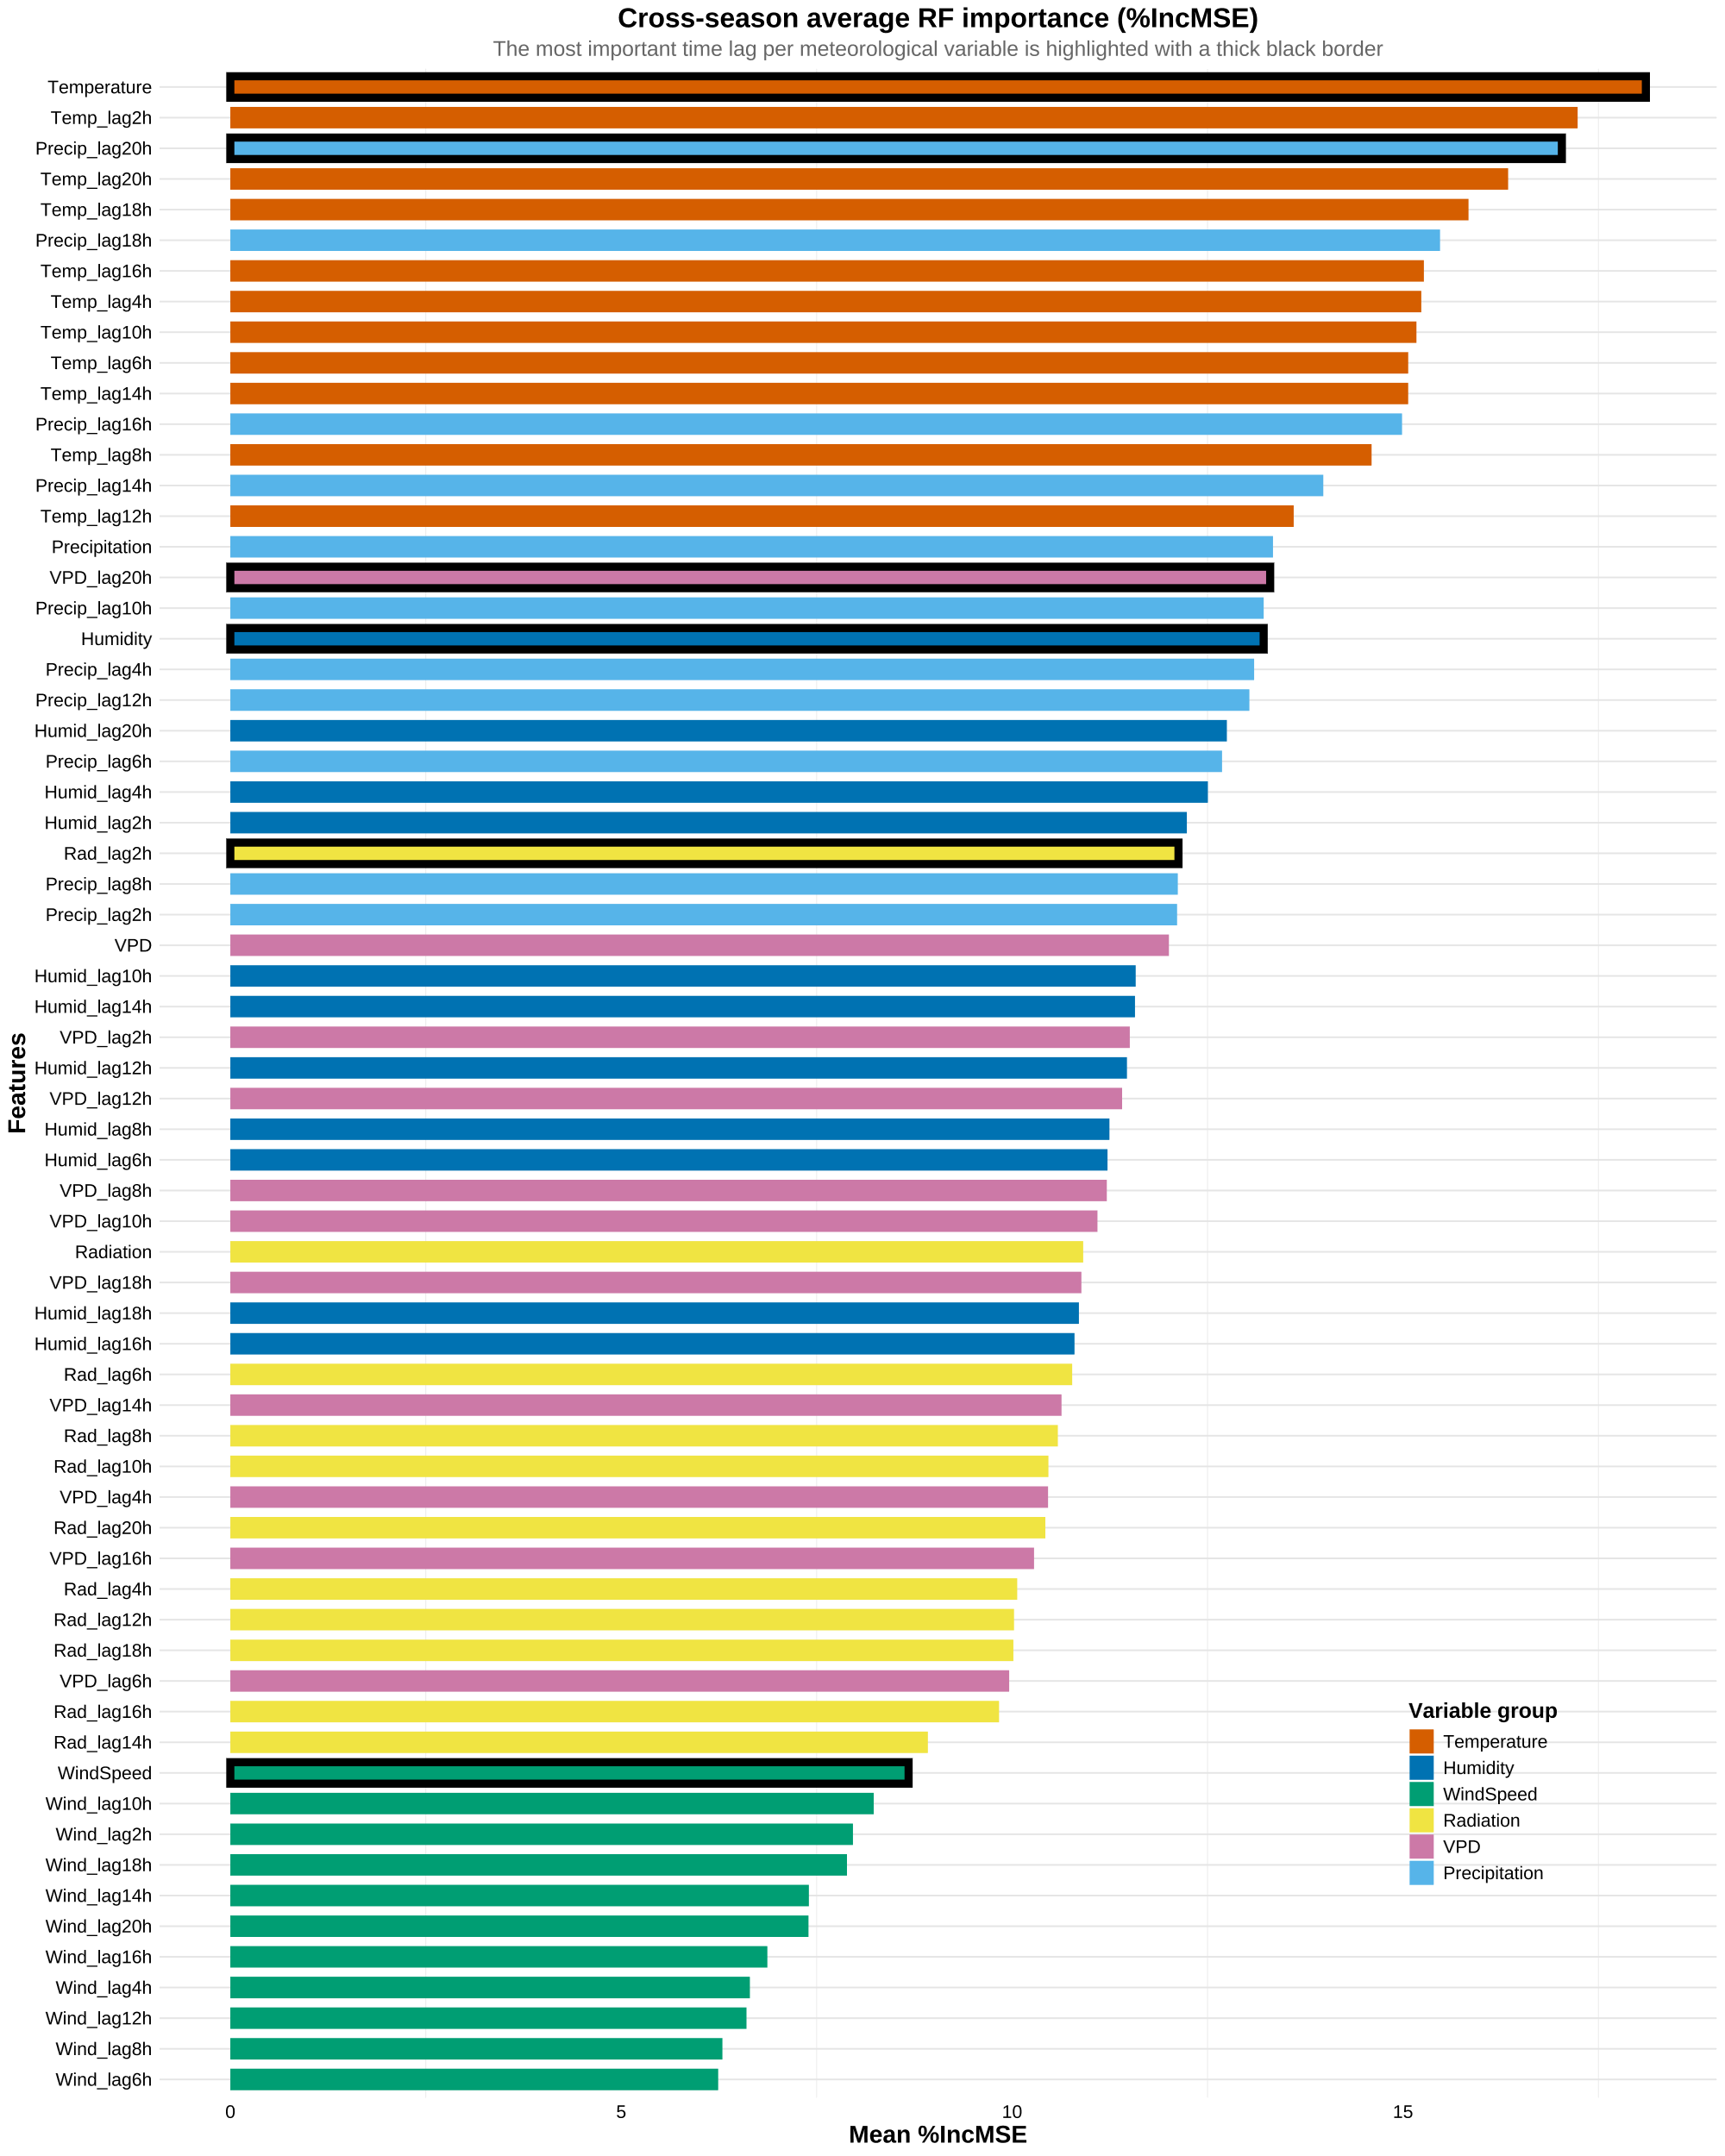


**Fig S6. Random Forest-based selection of representative meteorological predictors for structural equation modeling**
